# Supplementary material for: A full Brazilian or all natural: understanding the influences on young women’s decision to remove their pubic hair
Source: PubMed Central journal article supplement (PMC6921585; doi:10.1186/s12905-019-0868-1), 2019-12-19
Supplement: 12905_2019_868_MOESM1_ESM.pdf [file 12905_2019_868_MOESM1_ESM.pdf]

## Appendix A

### Pilot Questionnaire

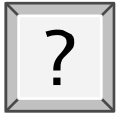

#### **PARTICIPANT INFORMATION FOR QUT RESEARCH PROJECT – Pilot –**

### **An Exploration of Attitudes Underlying Young Women's Decision to Remove Public and Private Body Hair.**

**QUT Ethics Approval Number 1700000408**

#### **RESEARCH TEAM.**

Principal Researcher: Ms Ebony Matthews Honours Student  
Associate Researchers: Dr Patricia Obst Principal  
Supervisor  
Professor Katherine White Associate Supervisor  
**School of Psychology and Counselling, Faculty of  
Health  
Queensland University of Technology (QUT)**

#### **DESCRIPTION**

This research project is being undertaken as part of an Honours thesis for Ebony Matthews.

The purpose of this research project is to examine the attitudes that influence hair removal practices among young women. Hair removal in this research will refer to both public hair removal (hair visible in clothes) and private hair removal (hair not usually visible in clothes).

You are invited to participate in this research project because you are a young woman aged between 17 and 25 years old living in Australia.

#### **PARTICIPATION**

Participation will involve completing an anonymous online survey that will take approximately 15 minutes of your time.

Questions will include:

What areas of the body would you define as those involving public hair removal?

Describe the typical woman who removes their private hair.

What are the advantages of removing hair that is publically visible?

Your participation in this research project is entirely voluntary. If you agree to participate you do not have to complete any question(s) you are uncomfortable answering. Your decision to participate or not participate will in no way impact upon your current or future relationship with QUT (for example your grades). If you do agree to participate you can withdraw from the research project during

your participation without comment or penalty. However as the survey is anonymous, once it has been submitted it will not be possible to withdraw.

### **EXPECTED BENEFITS**

It is expected that this research project will not directly benefit you. However, it may benefit the scientific and general community to better understand attitudes towards hair removal practices among young women and may be used to inform education campaigns.

### **RISKS**

There are minimal risks associated with your participation in this research project. These include possible discomfort in response to questions about private hair removal practices, and personal beliefs and attitudes towards hair removal both publicly visible and privately visible. You can skip any questions that you wish to and you can opt out of the survey at any time.

QUT provides for limited free psychology, family therapy or counselling services (face-to-face only) for research participants of QUT projects who may experience discomfort or distress as a result of their participation in the research. Should you wish to access this service please call the Clinic Receptionist on **07 3138 0999** (Monday–Friday only 9am–5pm), QUT Psychology and Counselling Clinic, 44 Musk Avenue, Kelvin Grove, and indicate that you are a research participant.

Alternatively, Lifeline provides access to online, phone or face-to-face support, call **13 11 14** for 24 hour telephone crisis support. For young people aged under 25 years, you can also call the Kids Helpline on **1800 551 800**.

### **PRIVACY AND CONFIDENTIALITY**

All comments and responses are anonymous and will be treated confidentially unless required by law. The names of individual persons are not required in any of the responses.

Any data collected as part of this research project will be stored securely as per QUT's Management of research data policy.

Please note that non-identifiable data from this research project may be used as comparative data in future research projects or stored on an open access database for secondary analysis.

### **CONSENT TO PARTICIPATE**

Submitting the completed online survey is accepted as an indication of your consent to participate in this project.

### **QUESTIONS / FURTHER INFORMATION ABOUT THE RESEARCH PROJECT**

If you have any questions or require further information please contact one of the listed researchers:

|                 |                                                                                  |              |
|-----------------|----------------------------------------------------------------------------------|--------------|
| Ebony Matthews  | <a href="mailto:ebony.matthews@connect.edu.au">ebony.matthews@connect.edu.au</a> |              |
| Patricia Obst   | <a href="mailto:p.obst@qut.edu.au">p.obst@qut.edu.au</a>                         | 07 3138 4931 |
| Katherine White | <a href="mailto:km.white@qut.edu.au">km.white@qut.edu.au</a>                     | 07 3138 4689 |

### **CONCERNS / COMPLAINTS REGARDING THE CONDUCT OF THE RESEARCH PROJECT**

QUT is committed to research integrity and the ethical conduct of research projects. However, if you do have any concerns or complaints about the ethical conduct of the research project you may contact the QUT Research Ethics Advisory Team on 07 3138 5123 or email [humanethics@qut.edu.au](mailto:humanethics@qut.edu.au). The QUT Research Ethics Advisory Team is not connected with the research project and can facilitate a resolution to your concern in an impartial manner.

**THANK YOU FOR HELPING WITH THIS RESEARCH PROJECT.  
PLEASE KEEP THIS SHEET FOR YOUR INFORMATION.**

### **Introduction**

Thank you for agreeing to participate in this research. You are here because you are a female aged between 17 and 25 years old and you live in Australia.

This survey is completely voluntary at all times and should you wish to withdraw, you may do so at anytime. All responses are non-identifiable. Email addresses and SONA codes are kept separately from responses at all times.

If this survey should bring up any difficult feelings please note that QUT provides for limited free psychology, family therapy or counselling services (face-to-face only) for research participants of QUT projects who may experience discomfort or distress as a result of their participation in the research and who live in Brisbane. Should you wish to access this service please call the Clinic Receptionist on 07 3138 0999 (Monday–Friday only, 9am–5pm), QUT Psychology and Counselling Clinic, 44 Musk Avenue, Kelvin Grove, and indicate that you are a research participant. Alternatively, Lifeline provides access to online, phone or face-to-face support, call 13 11 14 for 24-hour telephone crisis support. For young people aged between 5 and 25, you can also call the Kids Helpline on 1800 551 800.

If you have any further questions, please do not hesitate to contact the researchers:

Researcher: Ebony Matthews – [ebony.matthews@connect.qut.edu.au](mailto:ebony.matthews@connect.qut.edu.au)

Principal Supervisor: Dr Patricia Obst – [p.obst@qut.edu.au](mailto:p.obst@qut.edu.au)

Do you wish to participate in this survey?

Yes

No

1. What is your age?

16 or younger

17 - 25

26 or older

2. What is your sex?

Female

Male

Do not wish to specify

In your opinion, answer the following questions and statements.

3. What areas of the body would you consider as those involving the removal of hair that is publicly visible?

---

---

---

4. What areas of the body would you consider as those involving the removal of hair that is only privately visible?

---

---

---

Keeping in mind your previous responses of what public and private hair removal are, answer the following questions:

5. What do you see as the advantages of your engaging in the removal of hair that is publicly visible?

---

---

---

6. What do you see as the disadvantages of your engaging in the removal of hair that is publicly visible?

---

---

---

7. What do you see as the advantages of your engaging in the removal of hair that is only privately visible?

---

---

---

8. What do you see as the disadvantages of your engaging in the removal of hair that is privately visible?

---

---

---

When it comes to your engaging in hair removal, there might be individuals or groups who would think you should or should not perform this behaviour.

9. Please list the individuals or groups who would approve or think you should engage in the removal of hair that is publicly visible?

---

---

---

10. Please list the individuals or groups who would disapprove or think you should not engage in the removal of hair that is publicly visible?

---

---

---

11. Please list the individuals or groups who would approve or think you should engage in the removal of hair that is only privately visible?

---

---

---

12. Please list the individuals or groups who would disapprove or think you should not engage in the removal of hair that is only privately visible?

---

---

---

13. What factors or circumstances would help or encourage you to engage in the removal of hair that is publicly visible?

---

---

---

14. What factors or circumstances would prevent or discourage you from engaging in the removal of hair that is publicly visible?

---

---

---

15. What factors or circumstances would help or encourage you to engage in the removal of hair that is only privately visible?

---

---

---

16. What factors or circumstances would prevent or discourage you from engaging in the removal of hair that is only privately visible?

---

---

---

---

Think about what you imagine the type of person who engages in these different kinds of hair removal would be like.

19. What words can you think of that might describe a woman who engages in the removal of hair that is publicly visible.

---

---

---

20. What words can you think of that might describe a woman who does not engage in the removal of hair that is publicly visible.

---

---

---

21. What words can you think of that might describe a woman who engages in the removal of hair that is only privately visible.

---

---

---

22. What words can you think of that might describe a woman who does not engage in the removal of hair that is only privately visible.

---

---

---

23. Describe a scenario (situation, circumstance or event) that would prompt you to engage in the removal of hair that is publicly visible.

---

---

---

24. Describe a scenario (situation, circumstance or event) that would prompt you to engage in the removal of hair that is only privately visible.

---

---

---

**THANK YOU FOR PARTICIPATING**

## Appendix B

### Main Questionnaire

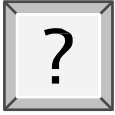

#### **PARTICIPANT INFORMATION FOR QUT RESEARCH PROJECT – Main Survey –**

### **An Exploration of Attitudes Underlying Young Women's Decision to Remove Public and Private Body Hair.**

**QUT Ethics Approval Number 1700000408**

#### **RESEARCH TEAM.**

Principal Researcher: Ms Ebony Matthews Honours Student  
Associate Researchers: Dr Patricia Obst Principal  
Supervisor  
Professor Katherine White Associate Supervisor  
**School of Psychology and Counselling, Faculty of  
Health  
Queensland University of Technology (QUT)**

#### **DESCRIPTION**

This research project is being undertaken as part of an Honours thesis for Ebony Matthews.

The purpose of this research project is to examine values (e.g. feminist values), beliefs, and attitudes (e.g. towards erotica/pornography) that may influence hair removal practices among young women. Hair removal in this research will refer to both public hair removal (hair visible in clothing) and private hair removal (hair not visible in clothing).

You are invited to participate in this research project because you are a young woman aged between 17 and 25 years old currently living in Australia.

#### **PARTICIPATION**

Participation will involve completing an anonymous online survey with mostly Likert scale answers (strongly agree – strongly disagree) that will take approximately 20-25 minutes of your time.

If you consent to be re-contacted via email (email addresses will be stored separately from your responses and will be deleted once sent), we will contact you 4 weeks later for a brief 5-10 minute follow-up survey. Survey responses will be matched via a unique code generated by you.

Examples of the types of questions in the survey include:

- Do you intend to remove your private hair in the next four weeks?
- Pornographic material increases the probability of sexual violence.

How vulnerable do you think you would be to getting a minor negative side effect (e.g. ingrown hairs, epidermal abrasions) from public hair removal in the next four weeks?

Your participation in this research project is entirely voluntary. If you agree to participate you do not have to complete any question(s) you are uncomfortable answering. Your decision to participate or not participate will in no way impact upon your current or future relationship with QUT (for example your grades). If you do agree to participate you can withdraw from the research project during your participation without comment or penalty. However as the survey is anonymous once it has been submitted it will not be possible to withdraw.

### **EXPECTED BENEFITS**

It is not expected that this research project will directly benefit you. However, it may benefit the scientific and general community to better understand attitudes towards hair removal practices among young women and may be used to inform education campaigns.

To recognise your contribution should you choose to participate in this study (completing both this survey and a one month follow-up survey) the research team is offering eligible students enrolled in PYB100 and PYB102 at QUT .5% of course credit through the SONA system.

If you are not eligible for credit you are eligible to go into a draw to win one of two \$50 Visa gift cards if you complete this survey and the one month follow-up survey. For those recruited through the SONA system you may choose either course credit or to go into the draw. Email addresses are required to go into the draw but these will be stored separately from survey responses and will be deleted once the prizes are claimed.

Please note the opening date for entries is 20/05/2017, the closing date for entries is 20/08/2017 and the prize/s are one of 2 \$50 Visa gift cards.

The Terms and Conditions of the prize draw can be located at:

<https://survey.qut.edu.au/survey-data/67/67667/media/62/6254.pdf>

### **RISKS**

There are minimal risks associated with your participation in this research project. These include possible discomfort in response to questions about private hair removal practices, and personal beliefs on private adult content (erotica). You can skip any questions you wish and you can opt out of the survey at any time.

QUT provides for limited free psychology, family therapy or counselling services (face-to-face only) for research participants of QUT projects who may experience discomfort or distress as a result of their participation in the research. Should you wish to access this service please call the Clinic Receptionist on **07 3138 0999** (Monday–Friday only 9am–5pm), QUT Psychology and Counselling Clinic, 44 Musk Avenue, Kelvin Grove, and indicate that you are a research participant.

Alternatively, Lifeline provides access to online, phone or face-to-face support, call **13 11 14** for 24 hour telephone crisis support. For young people aged under



25 years, you can also call the Kids Helpline on **1800 551 800**.

### **PRIVACY AND CONFIDENTIALITY**

All comments and responses are anonymous and will be treated confidentially unless required by law. The names of individual persons are not required in any of the responses.

Any data collected as part of this research project will be stored securely as per QUT's Management of research data policy.

Please note that non-identifiable data from this research project may be used as comparative data in future research projects or stored on an open access database for secondary analysis.

### **CONSENT TO PARTICIPATE**

Submitting the completed online survey is accepted as an indication of your consent to participate in this research project.

### **QUESTIONS / FURTHER INFORMATION ABOUT THE RESEARCH PROJECT**

If you have any questions or require further information please contact one of the listed researchers:

|                 |                                                                                  |              |
|-----------------|----------------------------------------------------------------------------------|--------------|
| Ebony Matthews  | <a href="mailto:ebony.matthews@connect.edu.au">ebony.matthews@connect.edu.au</a> |              |
| Patricia Obst   | <a href="mailto:p.obst@qut.edu.au">p.obst@qut.edu.au</a>                         | 07 3138 4931 |
| Katherine White | <a href="mailto:km.white@qut.edu.au">km.white@qut.edu.au</a>                     | 07 3138 4689 |

### **CONCERNS / COMPLAINTS REGARDING THE CONDUCT OF THE RESEARCH PROJECT**

QUT is committed to research integrity and the ethical conduct of research projects. However, if you do have any concerns or complaints about the ethical conduct of the research project you may contact the QUT Research Ethics Advisory Team on 07 3138 5123 or email [humanethics@qut.edu.au](mailto:humanethics@qut.edu.au). The QUT Research Ethics Advisory Team is not connected with the research project and can facilitate a resolution to your concern in an impartial manner.

**THANK YOU FOR HELPING WITH THIS RESEARCH PROJECT.  
PLEASE KEEP THIS SHEET FOR YOUR INFORMATION.**

## Introduction

**Thank you for agreeing to participate in this research. You are here because you are a female aged between 17 and 25 years old living in Australia.**

**This survey is completely voluntary at all times and should you wish to withdraw, you may do so at anytime. All responses are non-identifiable. Email addresses and SONA codes are kept separately from responses at all times.**

**If this survey should bring up any difficult feelings please note that QUT provides for limited free psychology, family therapy or counselling services (face-to-face only) for research participants of QUT projects who may experience discomfort or distress as a result of their participation in the research and who live in Brisbane. Should you wish to access this service please call the Clinic Receptionist on 07 3138 0999 (Monday–Friday**

**only, 9am–5pm), QUT Psychology and Counselling Clinic, 44 Musk Avenue, Kelvin Grove, and indicate that you are a research participant. Alternatively, Lifeline provides access to online, phone or face-to-face support, call 13 11 14 for 24-hour telephone crisis support. For young people 25 years old or younger, you can also call the Kids Helpline on 1800 551 800.**

**If you have any further questions, please do not hesitate to contact the researchers:**

**Researcher: Ebony Matthews – [ebony.matthews@connect.qut.edu.au](mailto:ebony.matthews@connect.qut.edu.au)**

**Principal Supervisor: Dr Patricia Obst – [p.obst@qut.edu.au](mailto:p.obst@qut.edu.au)**

## Begin Survey

1. Do you wish to participate in this survey? Yes

No

2. What is your age? 16 or younger

17 - 25

26 or older

3. What is your sex? Female

Male

Do not wish to specify

## UNIQUE IDENTIFIER CODE

### TIME 1

Thank you very much for agreeing to participate in this survey.  
All the information that you provide is anonymous and confidential.

**ALL Participants please follow this example to create your Anonymous Code Identifier:**

Example: Your first name is Michelle. Your mother's name is Jennifer. You were born on 17 June.

Your code identifier would be: **MIJE17**

|                   |                                                               |
|-------------------|---------------------------------------------------------------|
| <u>M</u> <u>I</u> | (a) What are the first 2 letters of your first name?          |
| <u>J</u> <u>E</u> | (b) What are the first 2 letters of your mother's first name? |
| <u>1</u> <u>7</u> | (c) What is the date (of the month) you were born on?         |

Your code identifier:

|              |                                                               |
|--------------|---------------------------------------------------------------|
| ____<br>____ | (a) What are the first 2 letters of your first name?          |
| ____<br>____ | (b) What are the first 2 letters of your mother's first name? |
| ____<br>____ | (c) What is the date (of the month) you were born on?         |

### Demographic Questions

4. What ethnicity do you identify with?

Caucasian

Other \_\_\_\_\_

5. Which of the following do you identify with:

Homosexual

Bisexual

Heterosexual

Other \_\_\_\_\_

6. What is your relationship status?

Single

Casually dating

In a committed relationship

Married

Divorced

Widowed

7. What is your current employment status?

Employed full-time

Employed part-time

Employed casually

Unemployed

Permanently ill/unable to work

Other

8. What is your highest level of education completed or currently completing?

Primary School

High School

Vocational Certificate

Diploma or certificate taking 12 months or more full-time

Bachelor degree or higher

Postgraduate degree (masters or PhD)

9. Do you follow any cultural/religious practices that restrict the amount of skin publicly shown?

Yes

No

10. Before tax is taken out, which of the following ranges best describes your income, from all sources, over the last 12 months?

Less than \$20,000

\$20,001 - \$30,000

\$30,001 - \$50,000

\$50,001 - \$100,000

\$100,001 - \$150,000

Over \$150,000

Don't know

## Part B

### Past Private Hair Removal Behaviour

The following questions will ask you about your past privately visible hair removal behaviour.

When answering the following questions, please keep the following definition of private hair removal behaviour in mind: Privately visible hair removal, is the removal of hair not visible in normal clothing (e.g. pubic hair, nipple hair, buttock hair).

33. Have you ever engaged in the removal of hair that was privately visible (e.g. pubic hair, nipple hair, buttock hair)?

Yes

No

34. In the last four weeks, did you engage in the removal of hair that was privately visible?

Yes

No

35. In the last four weeks, what was the most common method of removal you performed for hair that was privately visible?

Shaving

Waxing

Plucking

Removal creams

Laser hair removal/IPL

Electrolysis

36. In the last four weeks, how often did you engage in the removal of hair that was privately visible?

Never

Once

2 - 3 times

4 - 6 times

6 or more times

37. In the last four weeks, to what extent did you remove hair that was privately visible?

|                                             |                               |                               |                               |                               |                               |                                                 |
|---------------------------------------------|-------------------------------|-------------------------------|-------------------------------|-------------------------------|-------------------------------|-------------------------------------------------|
| 1<br>Not at all<br><input type="checkbox"/> | 2<br><input type="checkbox"/> | 3<br><input type="checkbox"/> | 4<br><input type="checkbox"/> | 5<br><input type="checkbox"/> | 6<br><input type="checkbox"/> | 7<br>A great extent<br><input type="checkbox"/> |
|---------------------------------------------|-------------------------------|-------------------------------|-------------------------------|-------------------------------|-------------------------------|-------------------------------------------------|





**Subjective Norms (privately visible)**

44. For engaging in the removal of hair that is privately visible in the next four weeks, do you agree that:

|                                                                                                                                           | Strongly Disagree | Disagree | Somewhat Disagree | Neither agree nor disagree | Somewhat Agree | Agree | Strongly Agree |
|-------------------------------------------------------------------------------------------------------------------------------------------|-------------------|----------|-------------------|----------------------------|----------------|-------|----------------|
| Most people who are important to me would approve of my engaging in the removal of hair that is privately visible in the next four weeks. | 1                 | 2        | 3                 | 4                          | 5              | 6     | 7              |
| Most people who are important to me think I should engage in the removal of hair that is privately visible in the next four weeks.        | 1                 | 2        | 3                 | 4                          | 5              | 6     | 7              |
| Most of my friends would engage in the removal of their own hair that is privately visible in the next four weeks.                        | 1                 | 2        | 3                 | 4                          | 5              | 6     | 7              |

**Indirect Beliefs on Subjective Norms (privately visible)**

45. How likely is it that the following people/groups would think you should engage in the removal of hair that is privately visible in the next four weeks?:

|                                                      | Very unlikely | Unlikely | Somewhat unlikely | Neither likely nor unlikely | Somewhat Likely | Likely | Very likely | Not Applicable           |
|------------------------------------------------------|---------------|----------|-------------------|-----------------------------|-----------------|--------|-------------|--------------------------|
| Friends                                              | 1             | 2        | 3                 | 4                           | 5               | 6      | 7           | <input type="checkbox"/> |
| Partner                                              | 1             | 2        | 3                 | 4                           | 5               | 6      | 7           | <input type="checkbox"/> |
| Media                                                | 1             | 2        | 3                 | 4                           | 5               | 6      | 7           | <input type="checkbox"/> |
| Beauty industry                                      | 1             | 2        | 3                 | 4                           | 5               | 6      | 7           | <input type="checkbox"/> |
| Sex industry                                         | 1             | 2        | 3                 | 4                           | 5               | 6      | 7           | <input type="checkbox"/> |
| Feminist groups                                      | 1             | 2        | 3                 | 4                           | 5               | 6      | 7           | <input type="checkbox"/> |
| Alternative people/groups (e.g. hippies/naturalists) | 1             | 2        | 3                 | 4                           | 5               | 6      | 7           | <input type="checkbox"/> |
| Society                                              | 1             | 2        | 3                 | 4                           | 5               | 6      | 7           | <input type="checkbox"/> |



**Perceived Behavioural Control (privately visible)**

46. For engaging in the removal of hair that is publicly visible in the next four weeks, do you agree that:

|                                                                                                           | Strongly Disagree | Disagree | Somewhat Disagree | Neither agree nor disagree | Somewhat Agree | Agree | Strongly Agree |
|-----------------------------------------------------------------------------------------------------------|-------------------|----------|-------------------|----------------------------|----------------|-------|----------------|
| I am confident that I can engage in the removal of hair that is privately visible in the next four weeks. | 1                 | 2        | 3                 | 4                          | 5              | 6     | 7              |
| My engaging in the removal of hair that is privately visible in the next four weeks is up to me.          | 1                 | 2        | 3                 | 4                          | 5              | 6     | 7              |

**Indirect Beliefs on Behavioural Control (privately visible)**

47. How likely in the next four weeks would the following factors stop you from engaging in the removal of hair that is privately visible:

|                   | Very unlikely | Unlikely | Somewhat unlikely | Neither likely nor unlikely | Somewhat Likely | Likely | Very likely |
|-------------------|---------------|----------|-------------------|-----------------------------|-----------------|--------|-------------|
| Lack of time      | 1             | 2        | 3                 | 4                           | 5               | 6      | 7           |
| Lack of equipment | 1             | 2        | 3                 | 4                           | 5               | 6      | 7           |
| Laziness          | 1             | 2        | 3                 | 4                           | 5               | 6      | 7           |

**Prototypes (privately visible)**

Now, we'd like you to think about the type of woman who engages in the removal of hair that is privately visible. We are not suggesting that all women who are like this are the same.

However, we are interested in what traits you think this type of woman is likely to have.

Please pick one on each line.

48. How likely is this woman to be each of the following?:

|                | Very unlikely | Unlikely | Somewhat unlikely | Neither likely nor unlikely | Somewhat Likely | Likely | Very likely |
|----------------|---------------|----------|-------------------|-----------------------------|-----------------|--------|-------------|
| Normal         | 1             | 2        | 3                 | 4                           | 5               | 6      | 7           |
| Clean          | 1             | 2        | 3                 | 4                           | 5               | 6      | 7           |
| Adventurous    | 1             | 2        | 3                 | 4                           | 5               | 6      | 7           |
| Self-conscious | 1             | 2        | 3                 | 4                           | 5               | 6      | 7           |

Now, we'd like you to think about the type of woman who does NOT engage in the removal of hair that is privately visible. We are not suggesting that all women who are like this are the same. However, we are interested in what traits you think this type of woman is likely to have.

Please pick one on each line.

49. How likely is this woman to be each of the following?:

|                                               | Very unlikely | Unlikely | Somewhat unlikely | Neither likely nor unlikely | Somewhat Likely | Likely | Very likely |
|-----------------------------------------------|---------------|----------|-------------------|-----------------------------|-----------------|--------|-------------|
| Normal                                        | 1             | 2        | 3                 | 4                           | 5               | 6      | 7           |
| Self-confident                                | 1             | 2        | 3                 | 4                           | 5               | 6      | 7           |
| Alternative/independent thinker (e.g. hippie) | 1             | 2        | 3                 | 4                           | 5               | 6      | 7           |
| Reserved                                      | 1             | 2        | 3                 | 4                           | 5               | 6      | 7           |
| Unbothered by others' opinions                | 1             | 2        | 3                 | 4                           | 5               | 6      | 7           |



### Behavioural Willingness (privately visible)

For the following scenarios please state how willing or not you would be to engage in the removal of hair that is publicly visible.

Scenario: You are going to the beach with some friends and are going to wear a bathing suit.

54. In this situation how willing would you be to:

|                                           | Very unwilling           | Unwilling                | Somewhat unwilling       | Neither willing or unwilling | Somewhat willing         | Willing                  | Very willing             |
|-------------------------------------------|--------------------------|--------------------------|--------------------------|------------------------------|--------------------------|--------------------------|--------------------------|
| Remove hair that is privately visible     | <input type="checkbox"/> | <input type="checkbox"/> | <input type="checkbox"/> | <input type="checkbox"/>     | <input type="checkbox"/> | <input type="checkbox"/> | <input type="checkbox"/> |
| Not remove hair that is privately visible | <input type="checkbox"/> | <input type="checkbox"/> | <input type="checkbox"/> | <input type="checkbox"/>     | <input type="checkbox"/> | <input type="checkbox"/> | <input type="checkbox"/> |

Scenario: You are going out on a date which you think will possibly lead to a sexual encounter that night.

55. In this situation how willing would you be to:

|                                           | Very unwilling           | Unwilling                | Somewhat unwilling       | Neither willing or unwilling | Somewhat willing         | Willing                  | Very willing             |
|-------------------------------------------|--------------------------|--------------------------|--------------------------|------------------------------|--------------------------|--------------------------|--------------------------|
| Remove hair that is privately visible     | <input type="checkbox"/> | <input type="checkbox"/> | <input type="checkbox"/> | <input type="checkbox"/>     | <input type="checkbox"/> | <input type="checkbox"/> | <input type="checkbox"/> |
| Not remove hair that is privately visible | <input type="checkbox"/> | <input type="checkbox"/> | <input type="checkbox"/> | <input type="checkbox"/>     | <input type="checkbox"/> | <input type="checkbox"/> | <input type="checkbox"/> |

### Behavioural intention (privately visible)

|                                                                                                         | Strongly Disagree | Disagree | Somewhat Disagree | Neither agree nor disagree | Somewhat Agree | Agree | Strongly Agree |
|---------------------------------------------------------------------------------------------------------|-------------------|----------|-------------------|----------------------------|----------------|-------|----------------|
| I intend to engage in the removal of hair that is privately visible in the next four weeks              | 1                 | 2        | 3                 | 4                          | 5              | 6     | 7              |
| It is likely that I will engage in the removal of hair that is privately visible in the next four weeks | 1                 | 2        | 3                 | 4                          | 5              | 6     | 7              |

## Attitudes Towards Erotica

The following statements inquire about your thoughts and feelings towards erotica (pornography). For each item, indicate how well you agree on a scale from strongly disagree to strongly agree.

|                                                                                                                                           | Strongly<br>Disagree     | Disagree                 | Neither agree<br>nor disagree | Agree                    | Strongly<br>Agree        |
|-------------------------------------------------------------------------------------------------------------------------------------------|--------------------------|--------------------------|-------------------------------|--------------------------|--------------------------|
| 1. The availability of the material leads to a breakdown in community morals.                                                             | <input type="checkbox"/> | <input type="checkbox"/> | <input type="checkbox"/>      | <input type="checkbox"/> | <input type="checkbox"/> |
| 2. This material should be made illegal                                                                                                   | <input type="checkbox"/> | <input type="checkbox"/> | <input type="checkbox"/>      | <input type="checkbox"/> | <input type="checkbox"/> |
| 3. I feel the material is offensive.                                                                                                      | <input type="checkbox"/> | <input type="checkbox"/> | <input type="checkbox"/>      | <input type="checkbox"/> | <input type="checkbox"/> |
| 4. The material should be available to adults.<br>(Reverse-coded)                                                                         | <input type="checkbox"/> | <input type="checkbox"/> | <input type="checkbox"/>      | <input type="checkbox"/> | <input type="checkbox"/> |
| 5. This material should be protected by the Australian Commission for Freedom of information, opinion, and expression.<br>(Reverse-coded) | <input type="checkbox"/> | <input type="checkbox"/> | <input type="checkbox"/>      | <input type="checkbox"/> | <input type="checkbox"/> |
| 6. The material increases the probability of sexual violence.                                                                             | <input type="checkbox"/> | <input type="checkbox"/> | <input type="checkbox"/>      | <input type="checkbox"/> | <input type="checkbox"/> |
| 7. The material exploits women.                                                                                                           | <input type="checkbox"/> | <input type="checkbox"/> | <input type="checkbox"/>      | <input type="checkbox"/> | <input type="checkbox"/> |
| 8. The material exploits men.                                                                                                             | <input type="checkbox"/> | <input type="checkbox"/> | <input type="checkbox"/>      | <input type="checkbox"/> | <input type="checkbox"/> |
| 9. In this material, the position and treatment of women are degrading to women.                                                          | <input type="checkbox"/> | <input type="checkbox"/> | <input type="checkbox"/>      | <input type="checkbox"/> | <input type="checkbox"/> |
| 10. In this material, the position and treatment of men are degrading to men.                                                             | <input type="checkbox"/> | <input type="checkbox"/> | <input type="checkbox"/>      | <input type="checkbox"/> | <input type="checkbox"/> |



## Appendix C

### Follow-Up Questionnaire (Time 2)

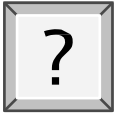

#### **PARTICIPANT INFORMATION FOR QUT RESEARCH PROJECT – Follow-up Survey –**

### **An Exploration of Attitudes Underlying Young Women's Decision to Remove Public and Private Body Hair.**

**QUT Ethics Approval Number 1700000408**

#### **RESEARCH TEAM.**

Principal Researcher: Ms Ebony Matthews Honours Student  
Associate Researchers: Dr Patricia Obst Principal  
Supervisor  
Professor Katherine White Associate Supervisor  
**School of Psychology and Counselling, Faculty of  
Health  
Queensland University of Technology (QUT)**

#### **DESCRIPTION**

This research project is being undertaken as part of an Honours thesis for Ebony Matthews.

The purpose of this research project is to examine body hair removal practices among young women.

**You must have previously filled in the initial survey four weeks ago to participate in the following survey.**

You are invited to participate in this research project because you are a young woman aged between 17 and 25 years old and currently live in Australia.

#### **PARTICIPATION**

Participation will involve completing an anonymous online survey that will take approximately 5-10 minutes of your time.

Questions will include:

In the last four weeks, did you remove your private body hair?

What was the most common method of private hair removal you performed in the last four weeks?

Your participation in this research project is entirely voluntary. If you agree to participate you do not have to complete any question(s) you are uncomfortable answering. Your decision to participate or not participate will in no way impact upon your current or future relationship with QUT (for example your grades). If

you do agree to participate you can withdraw from the research project during your participation without comment or penalty. However as the survey is anonymous once it has been submitted it will not be possible to withdraw.

### **EXPECTED BENEFITS**

It is expected that this research project will not directly benefit you. However, it may benefit the scientific and general community to better understand attitudes towards hair removal practices among young women and may be used to inform education campaigns.

To recognise your contribution should you choose to participate in this follow-up survey (having completed the first survey) the research team is offering eligible students enrolled in PYB100 and PYB102 at QUT .5% of course credit through the SONA system.

If you are not eligible for credit you are eligible to go into a draw to win one of two \$50 Visa gift cards if both the survey and follow-up survey have been completed. For those recruited through the SONA system you may choose either course credit or to go into the draw. Email addresses are required to go into the draw but these will be stored separately from survey responses and will be deleted once the prizes are claimed.

Please note the opening date for entries is 20/05/2017, the closing date for entries is 20/08/2017 and the prize/s are one of 2 \$50 Visa gift cards.

The Terms and Conditions of the prize draw can be located at:

<https://survey.qut.edu.au/survey-data/67/67667/media/62/6254.pdf>

### **RISKS**

There are minimal risks associated with your participation in this research project. These include possible discomfort in response to questions about private hair removal behaviours. You can skip any questions you wish and you can opt out of the survey at any time.

QUT provides for limited free psychology, family therapy or counselling services (face-to-face only) for research participants of QUT projects who may experience discomfort or distress as a result of their participation in the research. Should you wish to access this service please call the Clinic Receptionist on **07 3138 0999** (Monday–Friday only 9am–5pm), QUT Psychology and Counselling Clinic, 44 Musk Avenue, Kelvin Grove, and indicate that you are a research participant.

Alternatively, Lifeline provides access to online, phone or face-to-face support, call **13 11 14** for 24 hour telephone crisis support. For young people aged under 25 years, you can also call the Kids Helpline on **1800 551 800**.

### **PRIVACY AND CONFIDENTIALITY**

All comments and responses are anonymous and will be treated confidentially unless required by law. The names of individual persons are not required in any of the responses.

Any data collected as part of this research project will be stored securely as per QUT's Management of research data policy.



Please note that non-identifiable data from this research project may be used as comparative data in future research projects or stored on an open access database for secondary analysis.

### **CONSENT TO PARTICIPATE**

Submitting the completed online survey is accepted as an indication of your consent to participate in this research project.

### **QUESTIONS / FURTHER INFORMATION ABOUT THE RESEARCH PROJECT**

If you have any questions or require further information please contact one of the listed researchers:

|                 |                                                                                  |              |
|-----------------|----------------------------------------------------------------------------------|--------------|
| Ebony Matthews  | <a href="mailto:ebony.matthews@connect.edu.au">ebony.matthews@connect.edu.au</a> |              |
| Patricia Obst   | <a href="mailto:p.obst@qut.edu.au">p.obst@qut.edu.au</a>                         | 07 3138 4931 |
| Katherine White | <a href="mailto:km.white@qut.edu.au">km.white@qut.edu.au</a>                     | 07 3138 4689 |

### **CONCERNS / COMPLAINTS REGARDING THE CONDUCT OF THE RESEARCH PROJECT**

QUT is committed to research integrity and the ethical conduct of research projects. However, if you do have any concerns or complaints about the ethical conduct of the research project you may contact the QUT Research Ethics Advisory Team on 07 3138 5123 or email [humanethics@qut.edu.au](mailto:humanethics@qut.edu.au). The QUT Research Ethics Advisory Team is not connected with the research project and can facilitate a resolution to your concern in an impartial manner.

**THANK YOU FOR HELPING WITH THIS RESEARCH PROJECT.  
PLEASE KEEP THIS SHEET FOR YOUR INFORMATION.**

### **Introduction**

Thank you for agreeing to participate in this research. You are here because you are a female aged between **17 and 25 years old** who completed a survey four weeks previously.

This survey is completely voluntary at all times and should you wish to withdraw, you may do so at anytime. All responses are non-identifiable. Email addresses and SONA codes are kept separately from responses at all times.

If this survey should bring up any difficult feelings please note that QUT provides for limited free psychology, family therapy or counselling services (face-to-face only) for research participants of QUT projects who may experience discomfort or distress as a result of their participation in the research and who live in Brisbane. Should you wish to access this service please call the Clinic Receptionist on 07 3138 0999 (Monday–Friday only, 9am–5pm), QUT Psychology and Counselling Clinic, 44 Musk Avenue, Kelvin Grove, and indicate that you

are a research participant. Alternatively, Lifeline provides access to online, phone or face-to-face support, call 13 11 14 for 24-hour telephone crisis support. For young people 25 years old or younger, you can also call the Kids Helpline on 1800 551 800.

If you have any further questions, please do not hesitate to contact the researchers:

Researcher: Ebony Matthews – [ebony.matthews@connect.qut.edu.au](mailto:ebony.matthews@connect.qut.edu.au)

Principal Supervisor: Dr Patricia Obst – [p.obst@qut.edu.au](mailto:p.obst@qut.edu.au)

### **Begin Survey**

1. Do you wish to participate in this survey?

Yes

No

2. Did you previously complete the main study on hair removal?

Yes

No

## **UNIQUE IDENTIFIER CODE**

### **TIME 1**

**Thank you very much for agreeing to participate in this survey.  
All the information that you provide is anonymous and confidential.**

**ALL Participants please follow this example to create your Anonymous Code Identifier:**

Example: Your first name is Michelle. Your mother's name is Jennifer. You were born on 17 June.

Your code identifier would be: **MIJE17**

|                   |                                                               |
|-------------------|---------------------------------------------------------------|
| <u>M</u> <u>L</u> | (a) What are the first 2 letters of your first name?          |
| <u>J</u> <u>E</u> | (b) What are the first 2 letters of your mother's first name? |
| <u>1</u> <u>7</u> | (c) What is the date (of the month) you were born on?         |

Your code identifier:

|                           |                                                               |
|---------------------------|---------------------------------------------------------------|
| <p>_____</p> <p>_____</p> | (a) What are the first 2 letters of your first name?          |
| <p>_____</p> <p>_____</p> | (b) What are the first 2 letters of your mother's first name? |
| <p>_____</p> <p>_____</p> | (c) What is the date (of the month) you were born on?         |

### Past Private Hair Removal Behaviour

The following questions will ask you about your past privately visible hair removal behaviour.

When answering the following questions, please keep the following definition of private hair removal behaviour in mind: Privately visible hair removal, is the removal of hair not visible in normal clothing (e.g. pubic hair, nipple hair, buttock hair).

3. Have you ever engaged in the removal of hair that was privately visible (e.g. pubic hair, nipple hair, buttock hair)?

Yes

No

4. In the last four weeks, did you engage in the removal of hair that was privately visible?

Yes

No

5. In the last four weeks, what was the most common method of removal you performed for hair that was privately visible?

Shaving

Waxing

Plucking

Removal creams

Laser hair removal/IPL

Electrolysis

6. In the last four weeks, how often did you engage in the removal of hair that was privately visible?

Never

Once

2 - 3 times

4 - 6 times

6 or more times

7. In the last four weeks, to what extent did you remove hair that was privately visible?

|                                             |                               |                               |                               |                               |                               |                                                    |
|---------------------------------------------|-------------------------------|-------------------------------|-------------------------------|-------------------------------|-------------------------------|----------------------------------------------------|
| 1<br>Not at all<br><input type="checkbox"/> | 2<br><input type="checkbox"/> | 3<br><input type="checkbox"/> | 4<br><input type="checkbox"/> | 5<br><input type="checkbox"/> | 6<br><input type="checkbox"/> | 7<br>A great<br>extent<br><input type="checkbox"/> |
|---------------------------------------------|-------------------------------|-------------------------------|-------------------------------|-------------------------------|-------------------------------|----------------------------------------------------|

8. In the last four weeks, how often did you remove hair that was privately visible?

|                                        |                               |                               |                               |                               |                               |                                             |
|----------------------------------------|-------------------------------|-------------------------------|-------------------------------|-------------------------------|-------------------------------|---------------------------------------------|
| 1<br>Never<br><input type="checkbox"/> | 2<br><input type="checkbox"/> | 3<br><input type="checkbox"/> | 4<br><input type="checkbox"/> | 5<br><input type="checkbox"/> | 6<br><input type="checkbox"/> | 7<br>Very often<br><input type="checkbox"/> |
|----------------------------------------|-------------------------------|-------------------------------|-------------------------------|-------------------------------|-------------------------------|---------------------------------------------|

15. Which of the following best describes your pubic hair status in the last four weeks?

Definitions:

Au-natural – no removal of pubic hair

Basic bikini – only pubic hair extending beyond the bikini line is removed

French/Playboy – only a narrow strip or small mound of pubic hair is left

Brazilian/Hollywood – full removal of all pubic hair from front to back

Au-natural

Basic bikini

French/Playboy

Brazilian/Hollywood

**THANK YOU FOR PARTICIPATING!**

**Please click the link to enter your email address to go into the running to win one of two  
\$50 VISA gift-vouchers.**

**For SONA eligible participants, please click the SONA link to enter your 5-digit SONA code for your 1% course credit for participating in this research.**

**THE LINKS WILL OPEN IN NEW WINDOWS AND AT NO TIME CAN BE LINKED TO YOUR RESPONSES.**

**PRIZE DRAW LINK HERE**

**SONA LINK HERE**
